# Supplementary material for: In-silico Based Designing of Benzo[d]thiazol-2-amine Derivatives as Analgesic and Anti-Inflammatory Agents
Source: Preprints.org preprint supplement (doi:10.20944/preprints202306.1064.v1), 2023-06-27
Supplement: Supplementary file 2 [file supplementary]

**Table 1.** Pharmacokinetic, drug likeness and toxicity parameters of synthesized benzo[d]thiazol-2 amine derivatives and reference standard drug.

| CCa | GIAb | BBBc | Log Kp | CARd | MUTe | REf | SIg | BSh | ABS (%)i | Lipinski |
| --- | --- | --- | --- | --- | --- | --- | --- | --- | --- | --- |
| G-1 | High | No | -4.38 | Non-toxic | Non-toxic | Non-toxic | Non-toxic | 0.55 | 97.28 | Yes |
| G-2 | High | No | -5.39 | Non-toxic | Non-toxic | Non-toxic | Non-toxic | 0.55 | 97.28 | Yes |
| G-3 | Low | No | -4.78 | Non-toxic | Non-toxic | Non-toxic | Non-toxic | 0.55 | 78.64 | Yes |
| G-4 | High | No | -4.96 | Non-toxic | Non-toxic | Non-toxic | Non-toxic | 0.55 | 87.77 | Yes |
| G-5 | High | No | -4.69 | Non-toxic | Non-toxic | Non-toxic | Non-toxic | 0.55 | 97.28 | Yes |
| G-6 | High | No | -4.46 | Non-toxic | Non-toxic | Non-toxic | Non-toxic | 0.55 | 97.28 | Yes |
| G-7 | High | No | -4.90 | Non-toxic | Non-toxic | Non-toxic | Non-toxic | 0.55 | 93.71 | Yes |
| G-8 | High | No | -4.73 | Non-toxic | Non-toxic | Non-toxic | Non-toxic | 0.55 | 96.12 | Yes |
| G-9 | Low | No | -4.78 | Non-toxic | Non-toxic | Non-toxic | Non-toxic | 0.55 | 78.64 | Yes |
| G-10 | High | No | -5.27 | Non-toxic | Non-toxic | Non-toxic | Non-toxic | 0.55 | 87.77 | Yes |
| G-11 | High | No | -3.99 | Non-toxic | Non-toxic | Non-toxic | Non-toxic | 0.55 | 97.28 | Yes |
| G-12 | High | No | -4.46 | Non-toxic | Non-toxic | Non-toxic | Non-toxic | 0.55 | 97.28 | Yes |
| G-13 | High | No | -5.39 | Non-toxic | Non-toxic | Non-toxic | Non-toxic | 0.55 | 97.28 | Yes |
| Ind. | High | Yes | -5.45 | Non-toxic | Non-toxic | Non-toxic | Non-toxic | 0.85 | 85.94 | Yes |

a Compound Code

b GI absorption

c Blood brain barrier permeation

d Carcinogenicity.

e Mutagenicity.

f Reproductive effects.

g Skin irritation.

h Bioavailability score.

iAbsorption

**Table 2.** Structures of newly synthesized benzo[d]thiazol-2-amine derivatives.

| G1 | G2 |
| --- | --- |
| G3 | G4 |
| G5 | G6 |
| G7 | G8 |
| G9 | G10 |
| G11 | G12 |
| G13 |  |

| **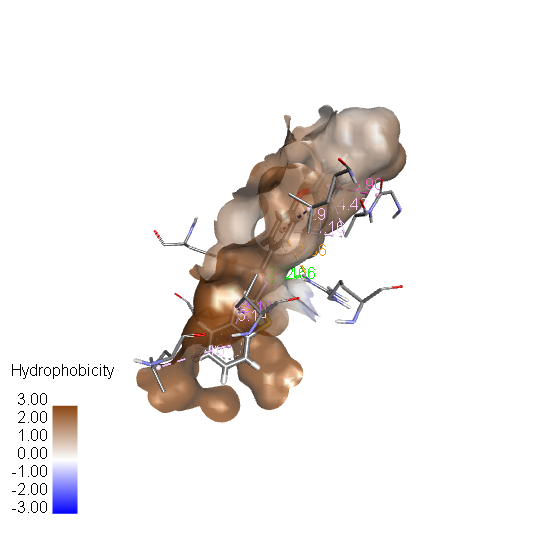**  **G-1** | **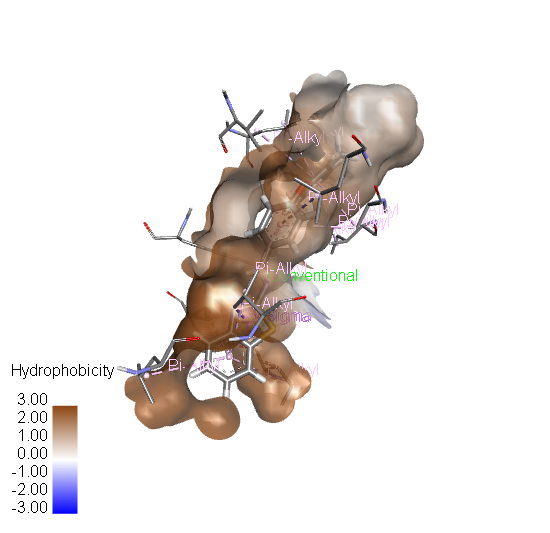**  **G-2** |
| --- | --- |
| **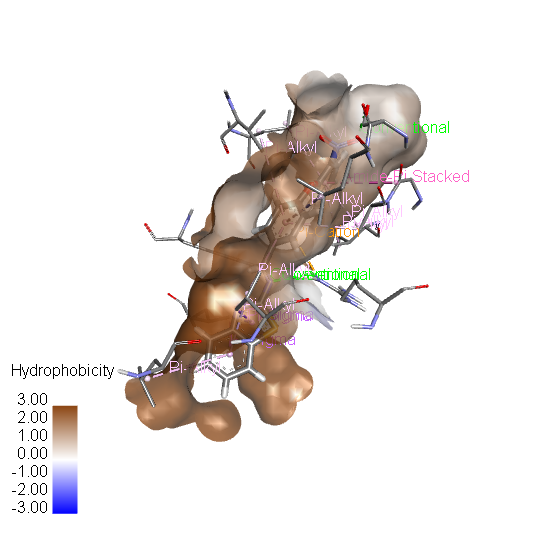**  **G-3** | **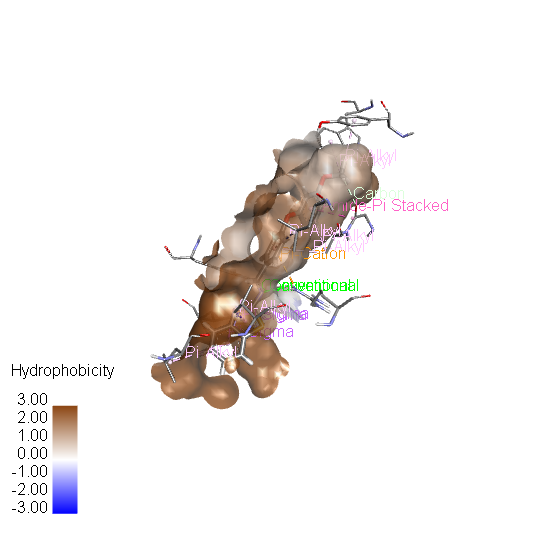**  **G-4** |
| **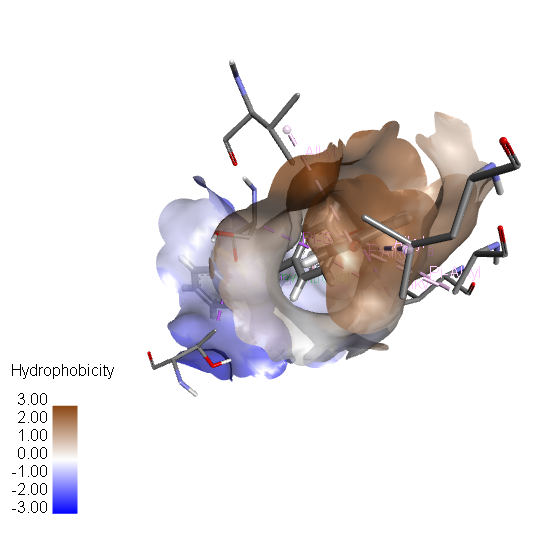**  **G-5** | **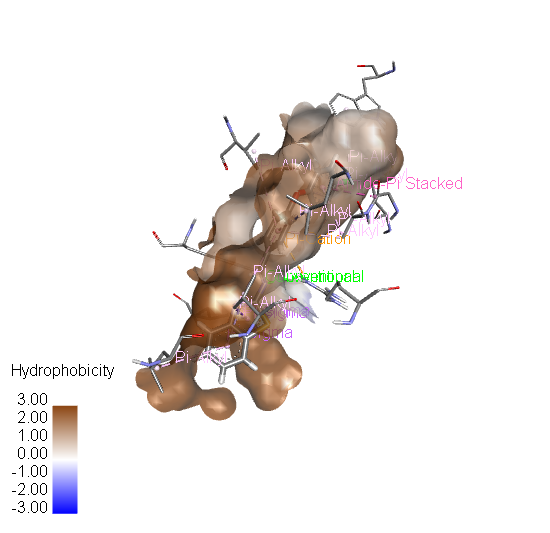**  **G-6** |
| **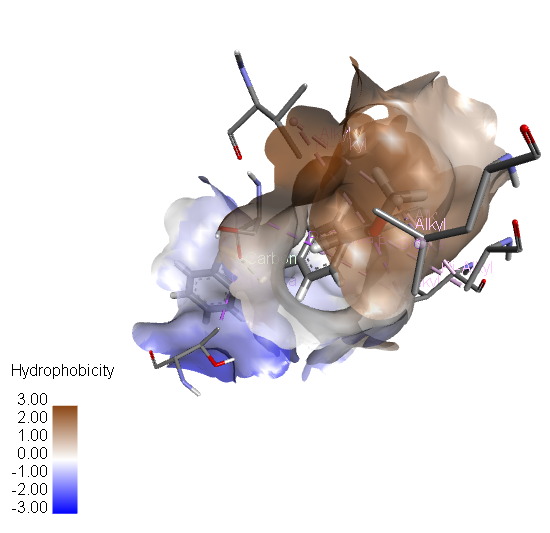**  **G-7** | **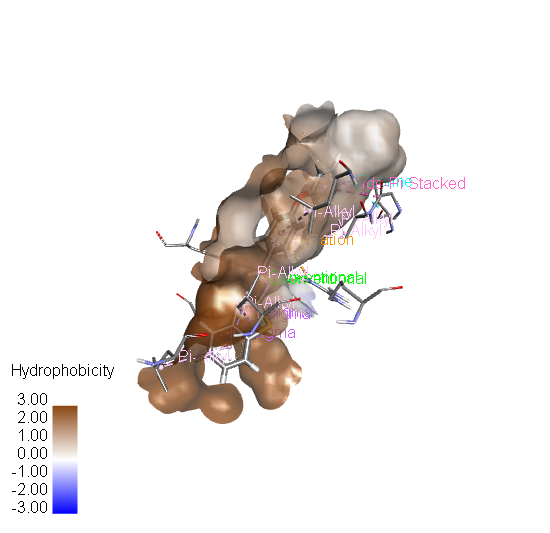**  **G-8** |
| **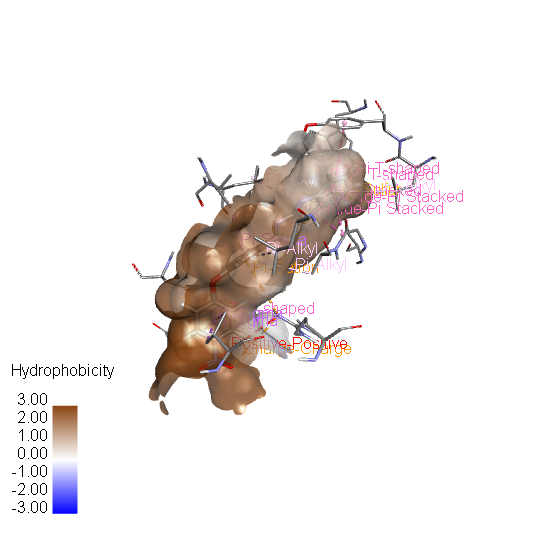**  **G-9** | **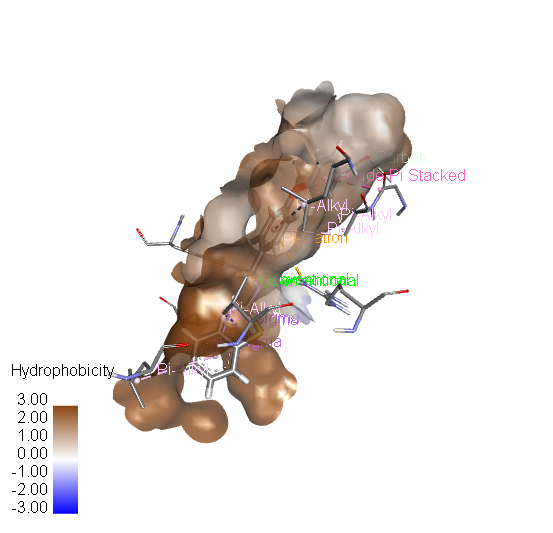**  **G-10** |
| **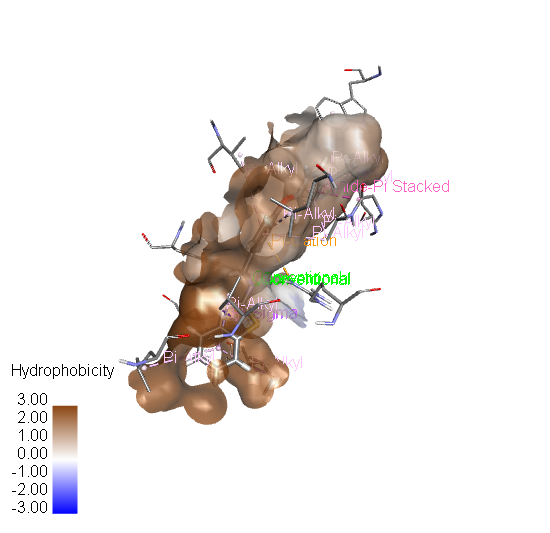**  **G-11** | **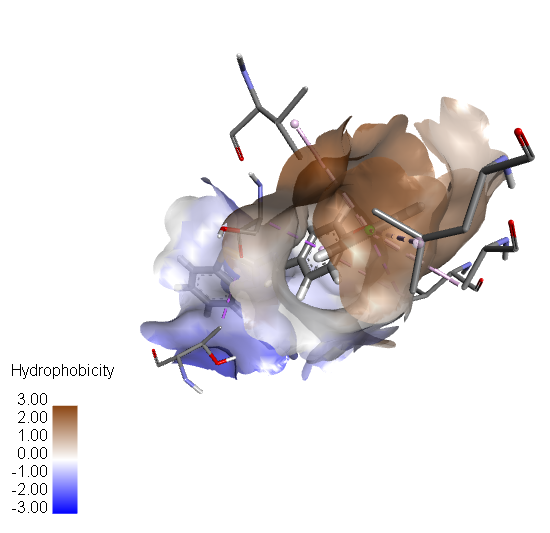**  **G-12** |
| **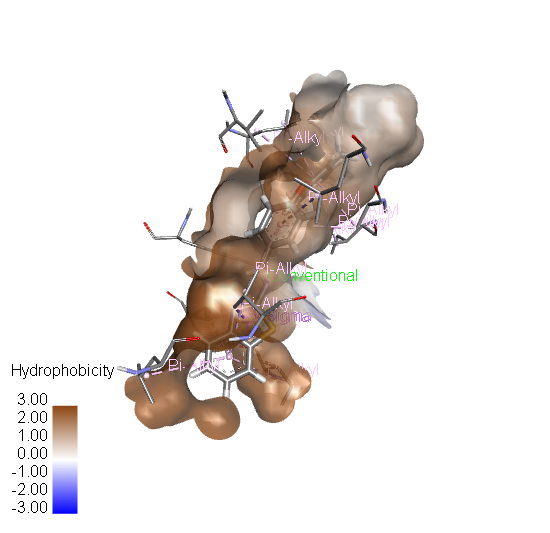**  **G-13** |  |

**Figure 1.** The hydrophobic interactions surfaces for molecule G-1, G-2, G-3, G-4, G-5, G-6, G-7, G-8, G-9, G-10, G-11 and G-12 with COX-1.

| **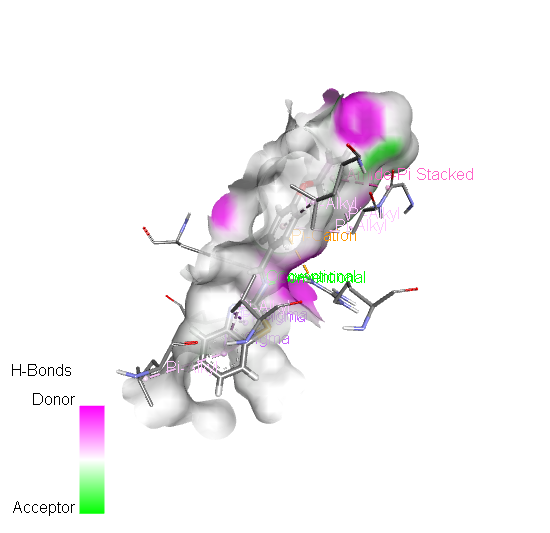**  **G-1** | **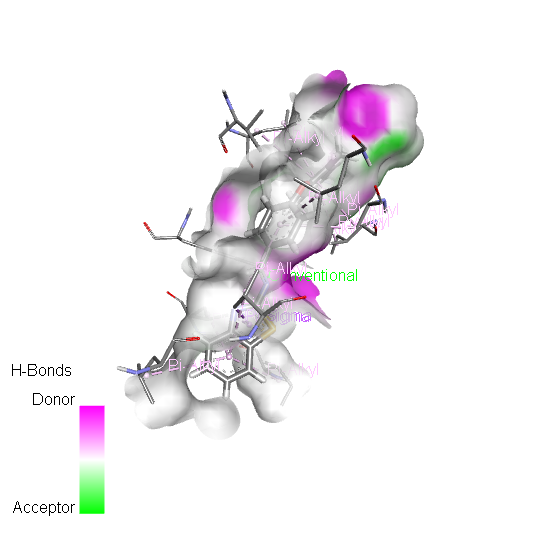**  **G-2** |
| --- | --- |
| **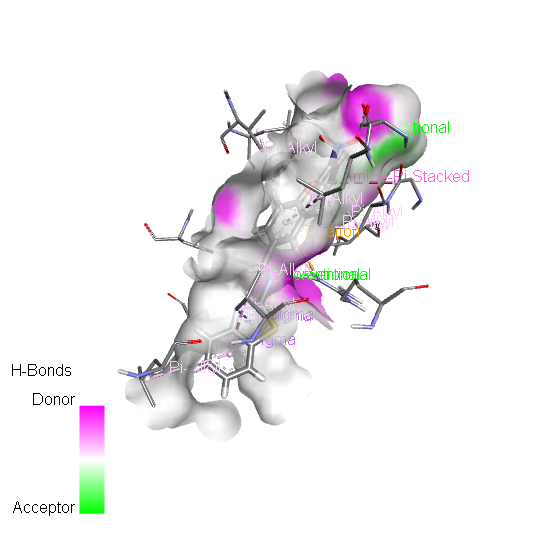**  **G-3** | **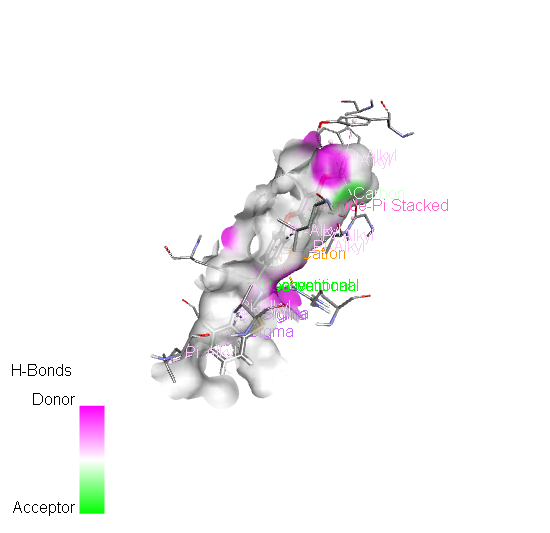**  **G-4** |
| **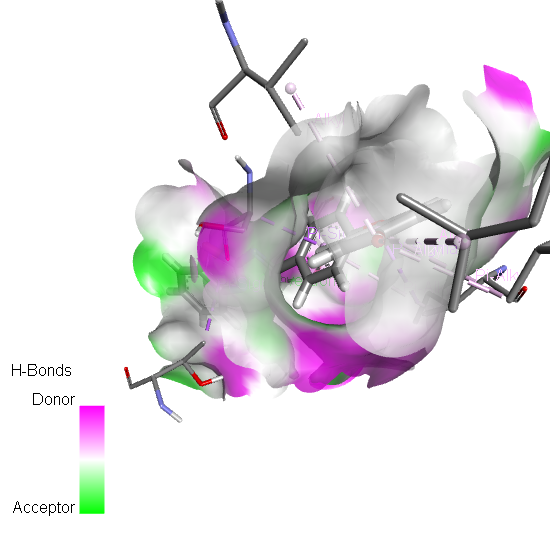**  **G-5** | **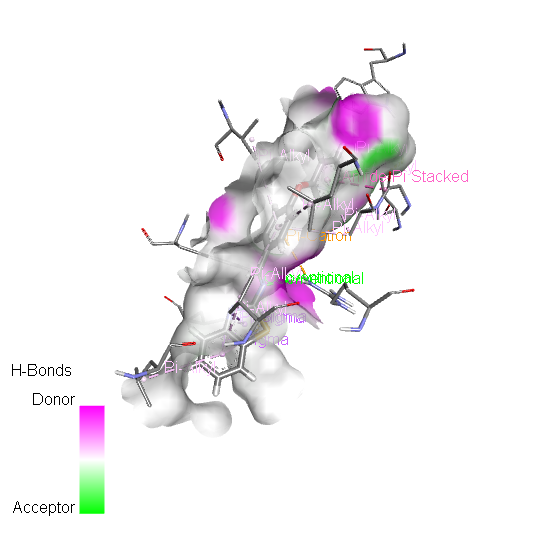**  **G-6** |
| **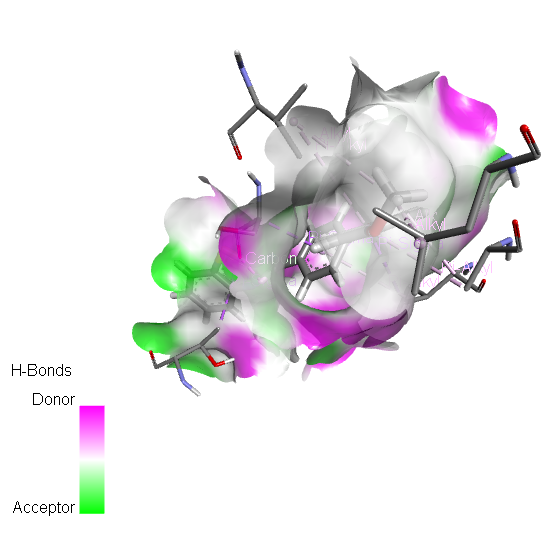**  **G-7** | **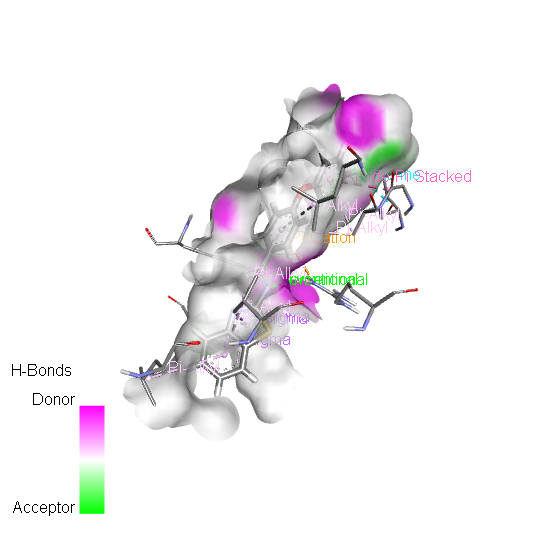**  **G-8** |
| **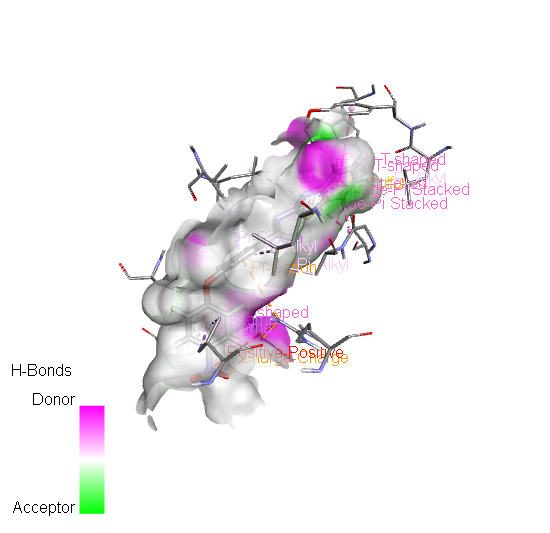**  **G-9** | **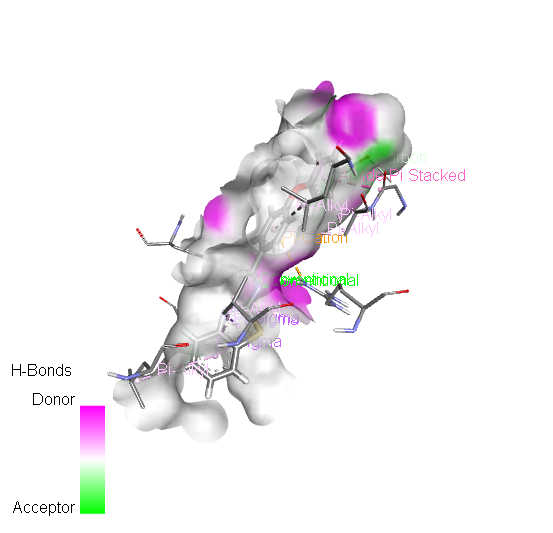**  **G-10** |
| **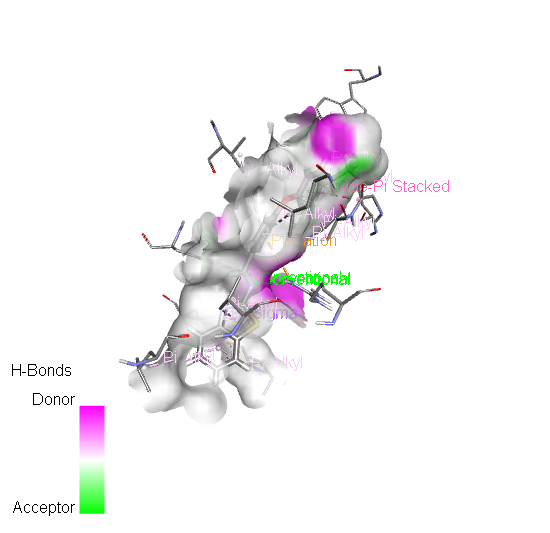**  **G-11** | **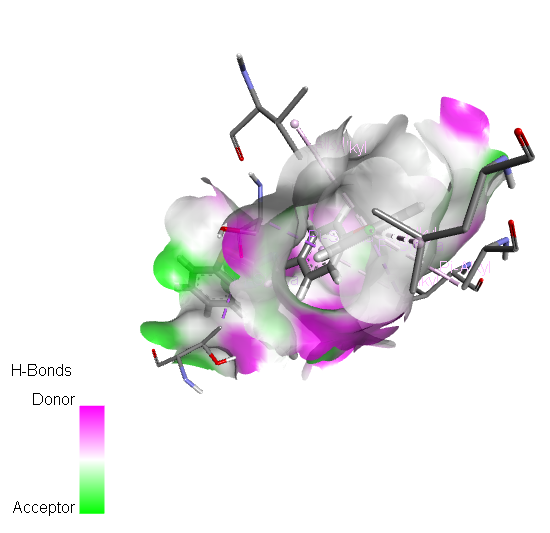**  **G-12** |
| **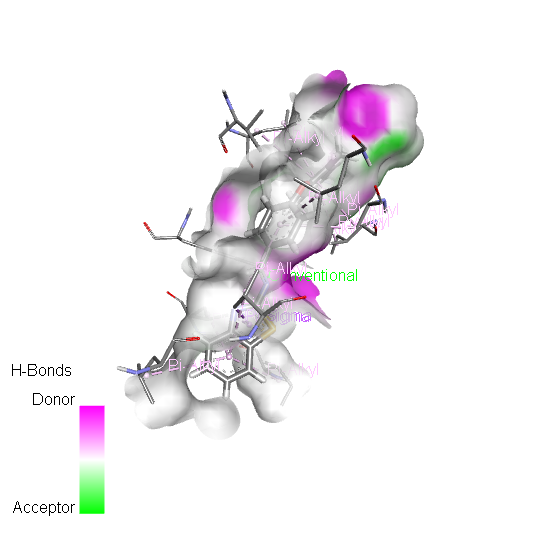**  **G-13** |  |

**Figure 2.** The hydrogen bond surfaces for molecule G-1, G-2, G-3, G-4, G-5, G-6, G-7, G-8, G-9, G-10, G-11 and G-12 with COX-1.

| 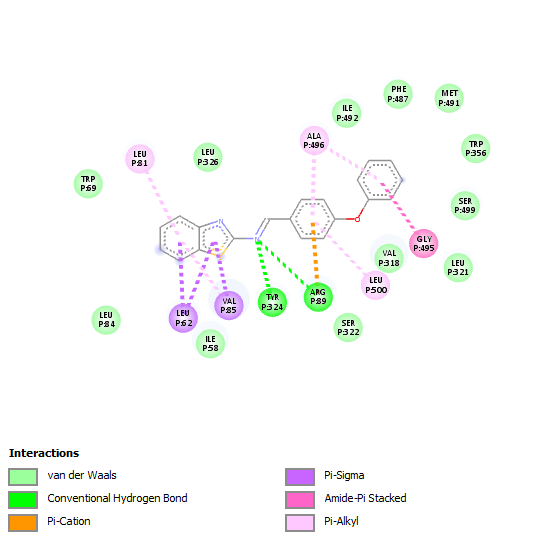  G-1 | 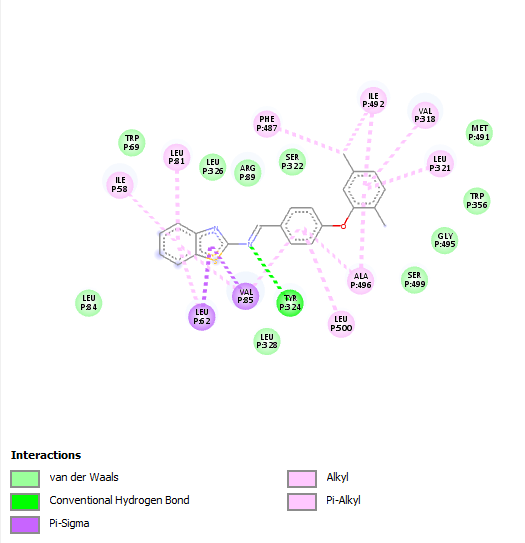  G-2 |
| --- | --- |
| 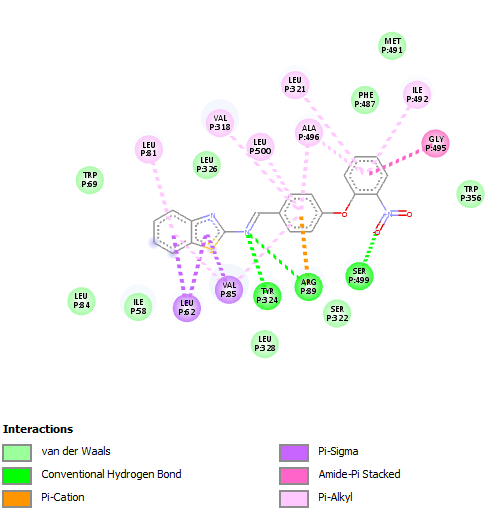  G-3 | 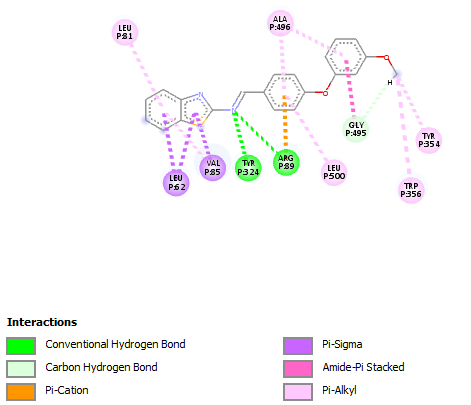  G-4 |
| 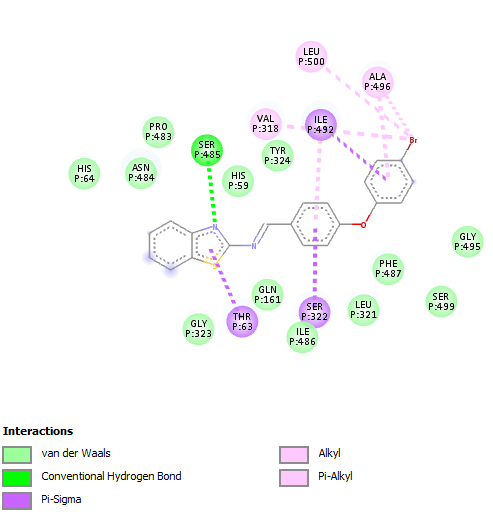  G-5 | 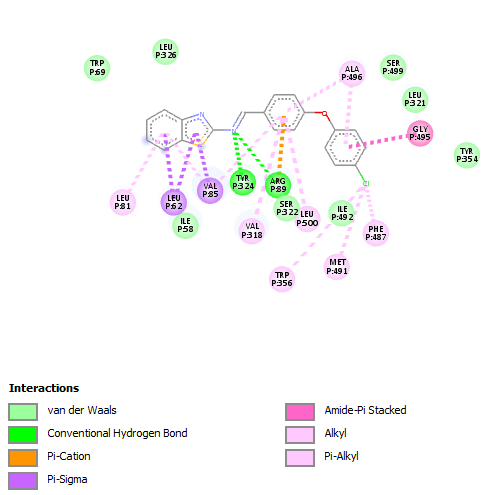  G-6 |
| 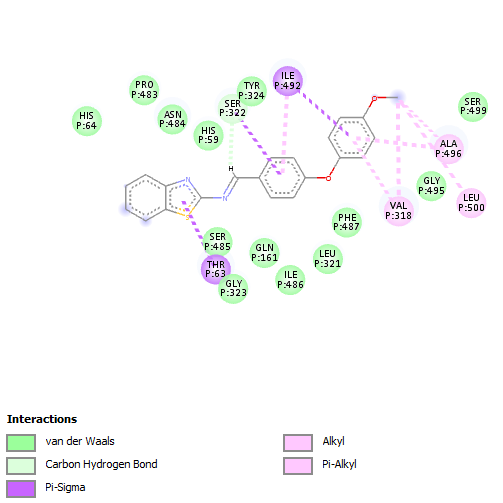  G-7 | 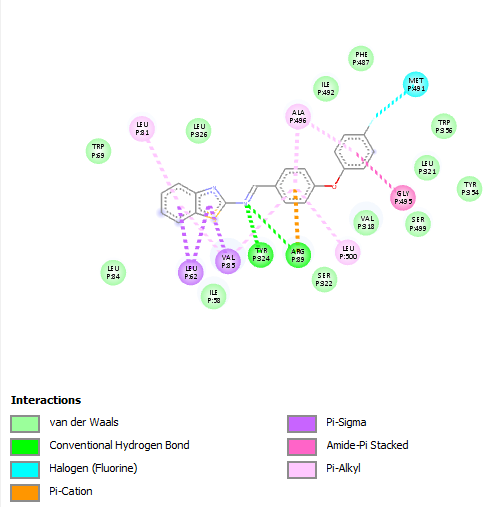  G-8 |
| 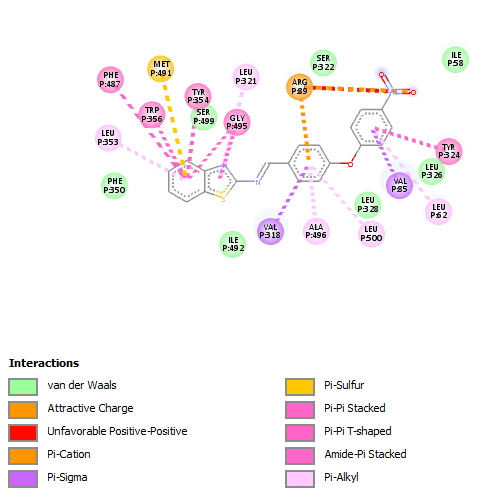  G-9 | 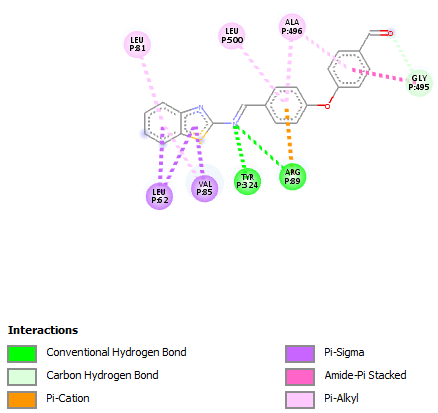  G-10 |
| 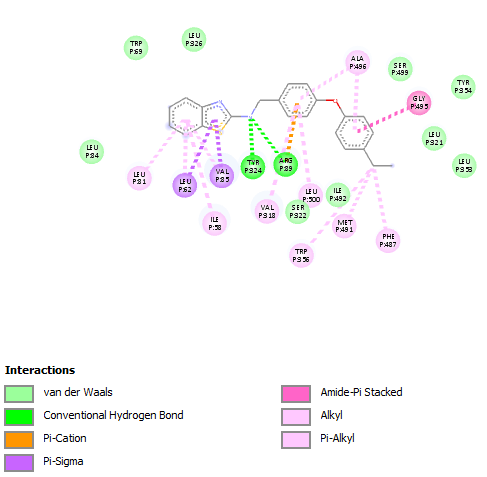  G-11 | 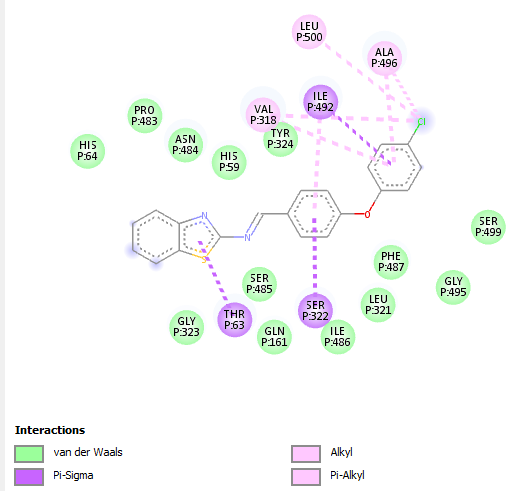  G-12 |
| 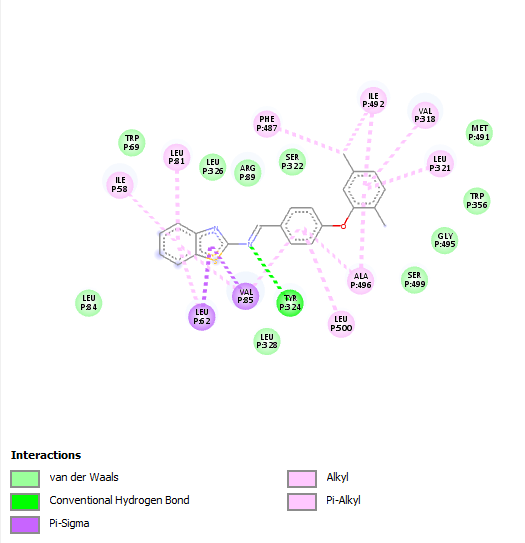  G-13 | 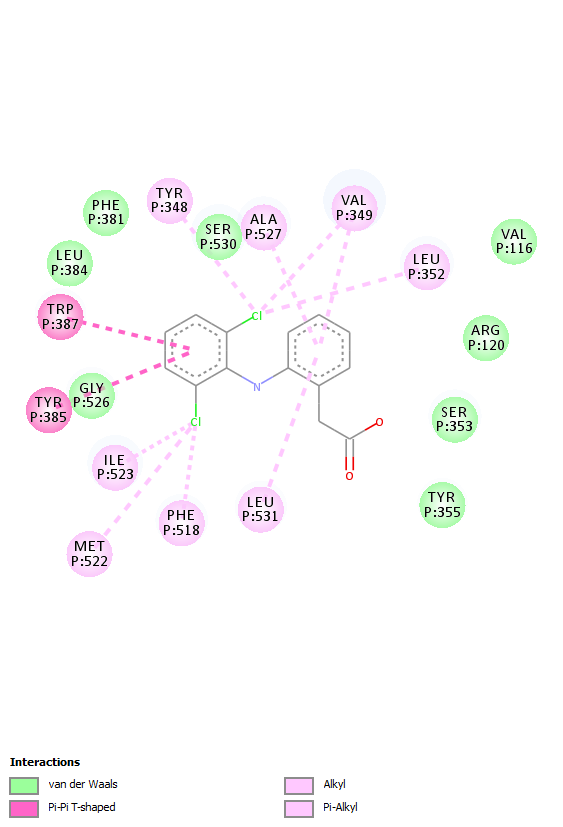  Diclofenac Sodium |

**Figure 3:** COX-1 complex with G-1, G-2, G-3, G-4, G-5, G-6, G-7, G-8, G-9, G-10, G-11, G-12 and G-13.

| 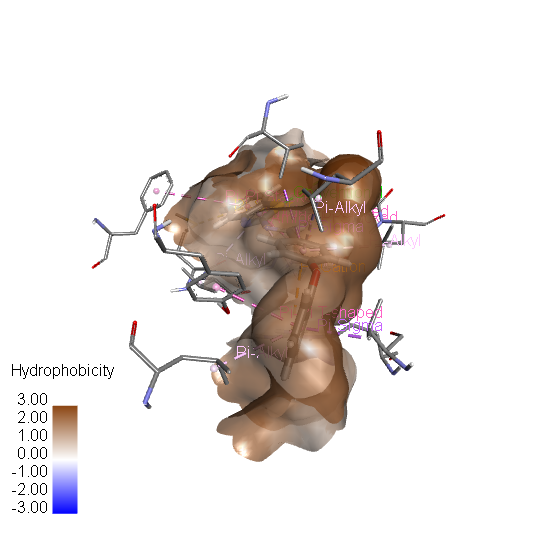  **G-1** | **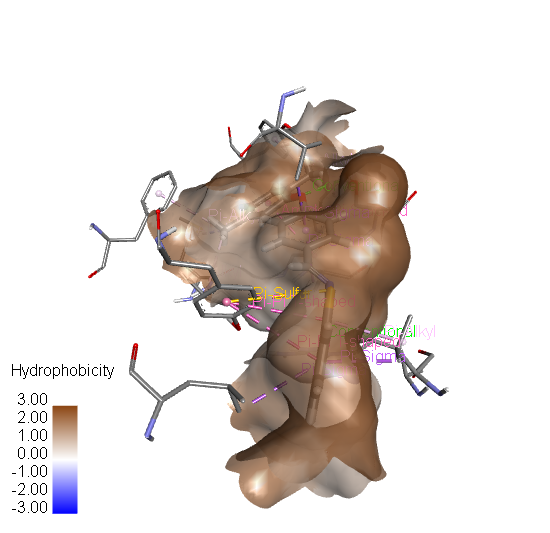**  **G-2** |
| --- | --- |
| 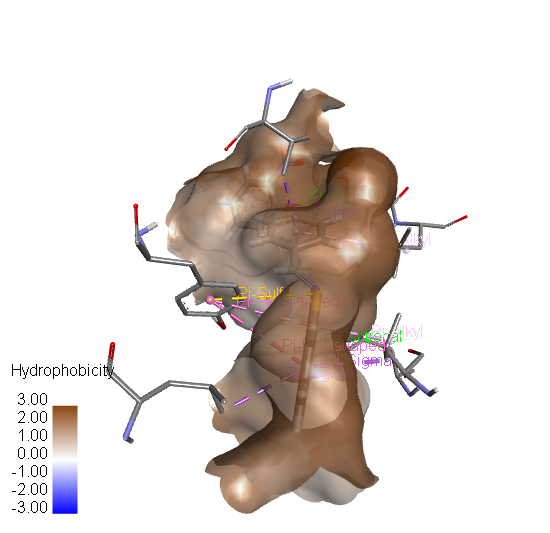  **G-3** | **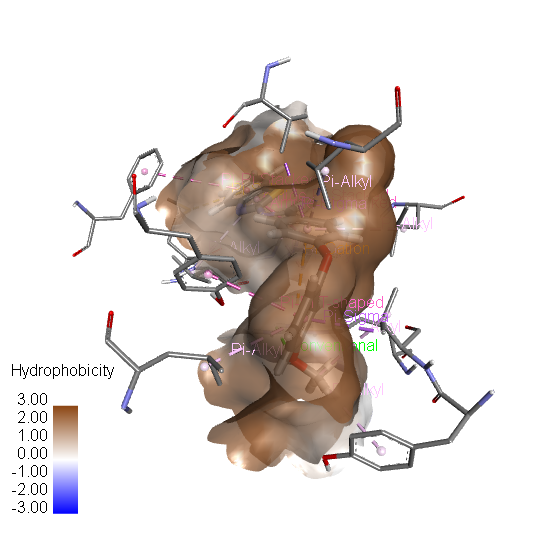**  **G-4** |
| 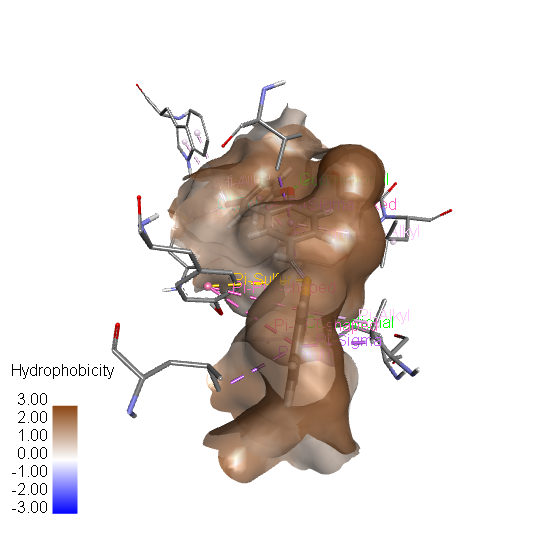  **G-5** | **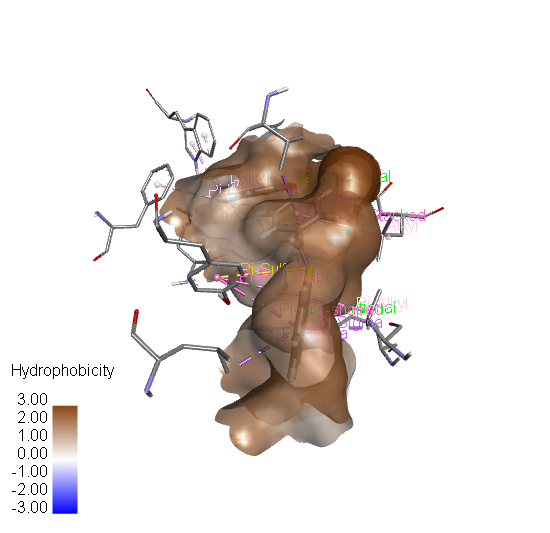**  **G-6** |
| 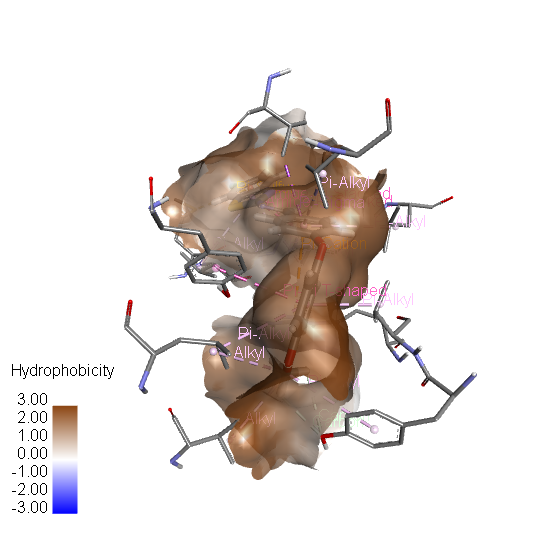  **G-7** | **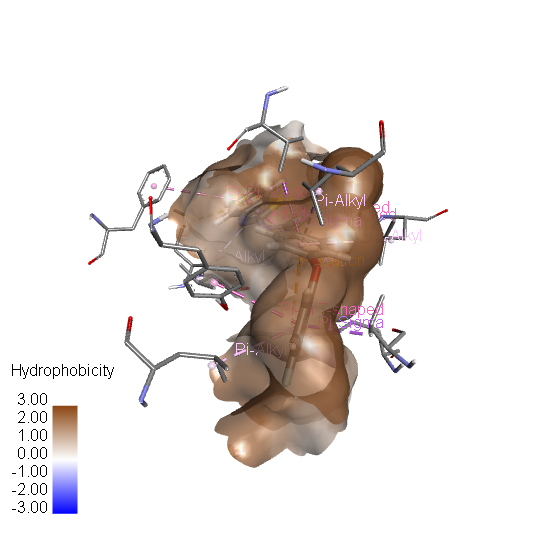**  **G-8** |
| 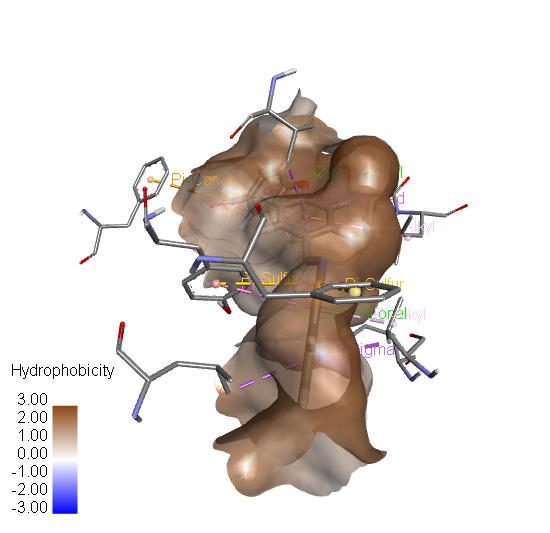  **G-9** | **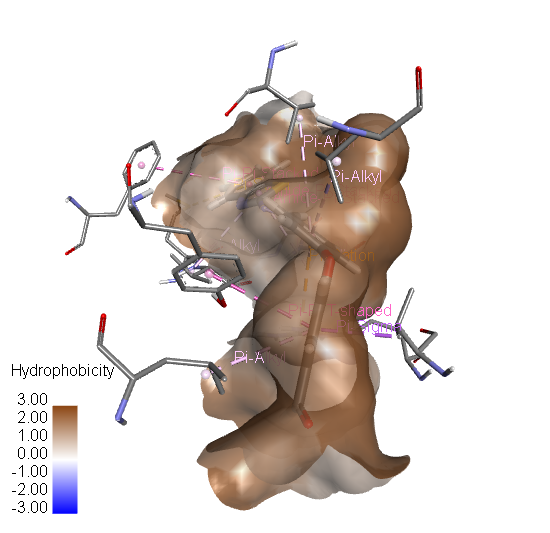**  **G-10** |
| 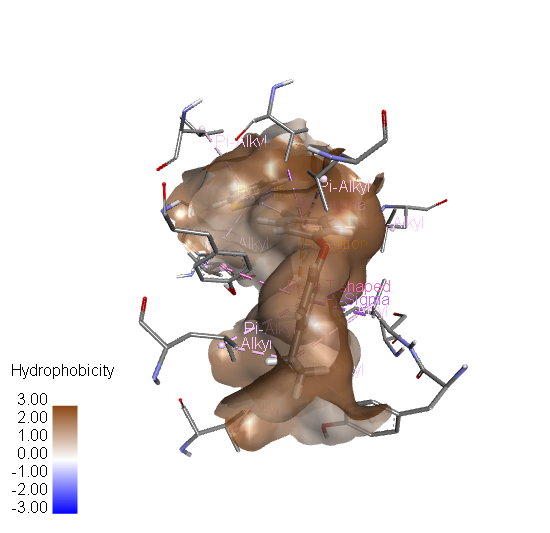  **G-11** | **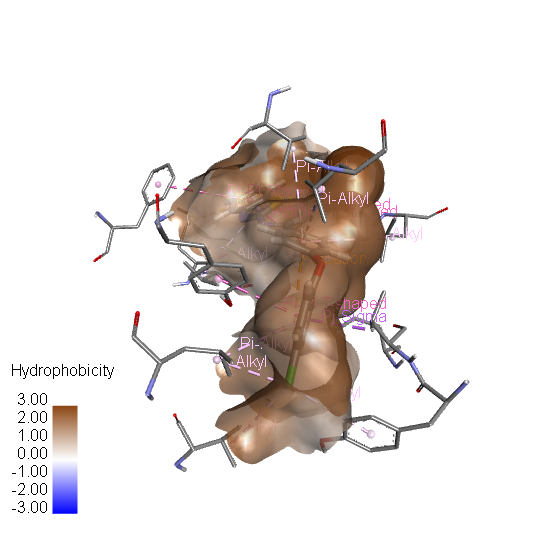**  **G-12** |
| 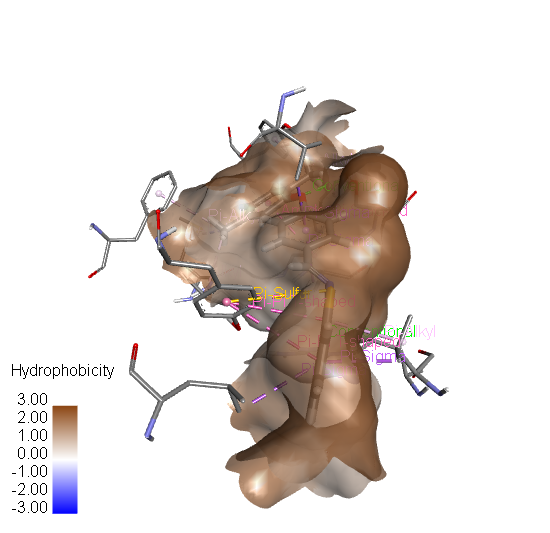  **G-13** |  |

**Figure 4.** Hydrophobic interactions surfaces for molecule G-1, G-2, G-3, G-4, G-5, G-6, G-7, G-8, G-9, G-10, G-11, G-12 and G-13 with COX-2.

| **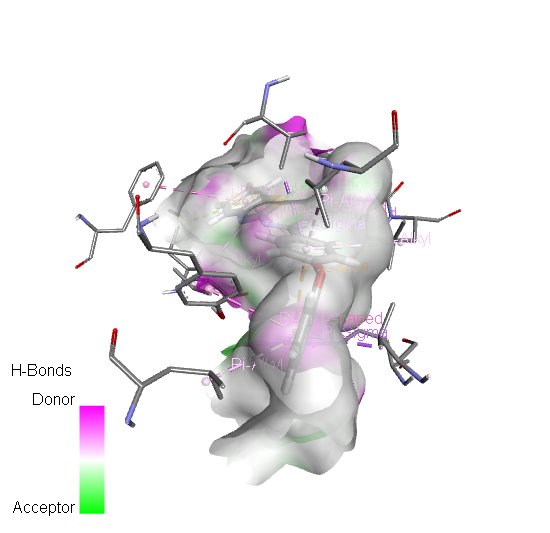**  **G-1** | **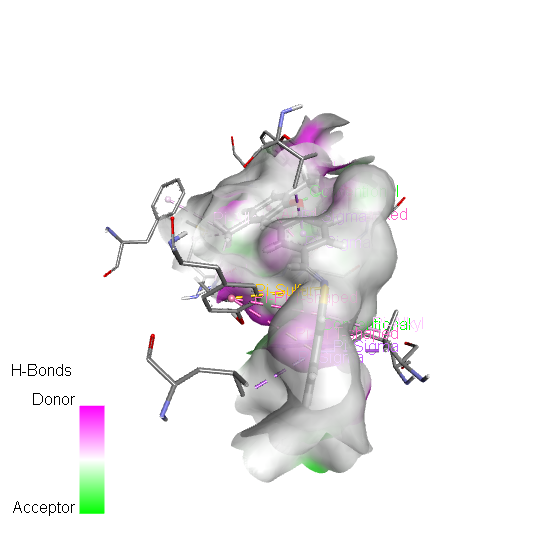**  **G-2** |
| --- | --- |
| **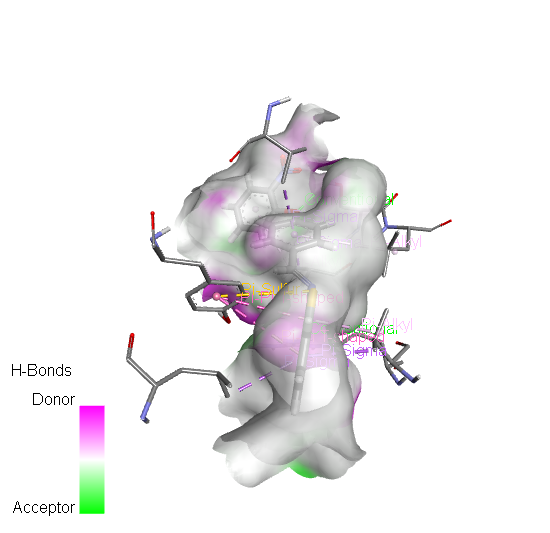**  **G-3** | **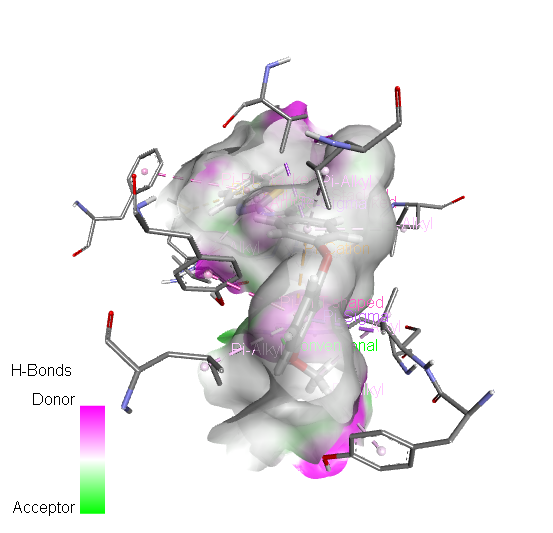**  **G-4** |
| **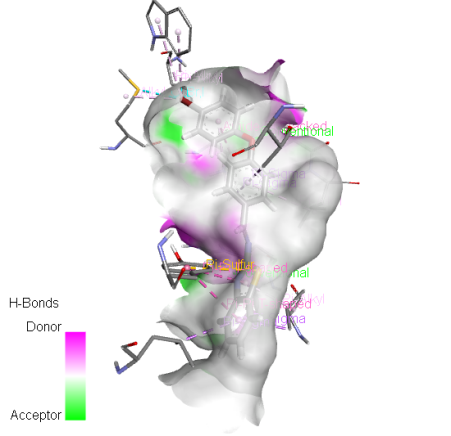**  **G-5** | **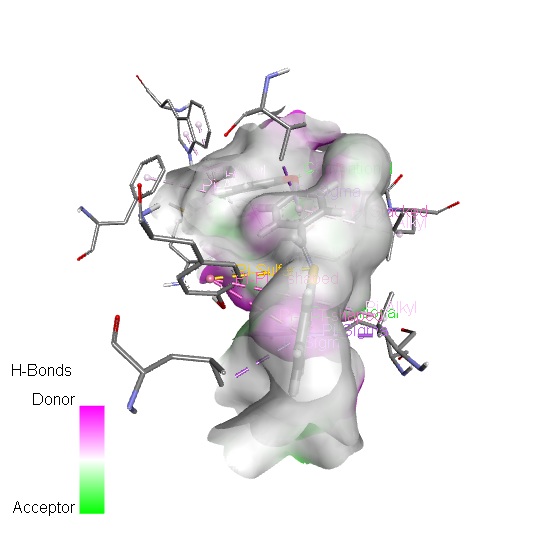**  **G-6** |
| **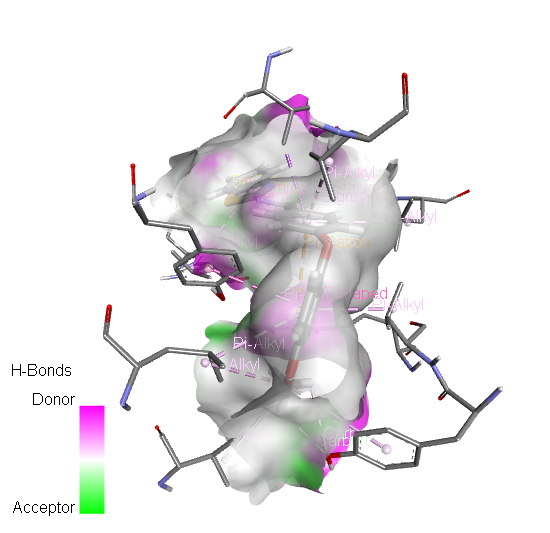**  **G-7** | **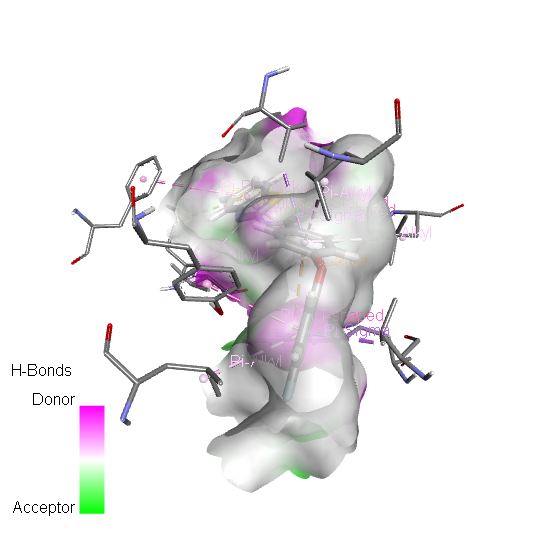**  **G-8** |
| 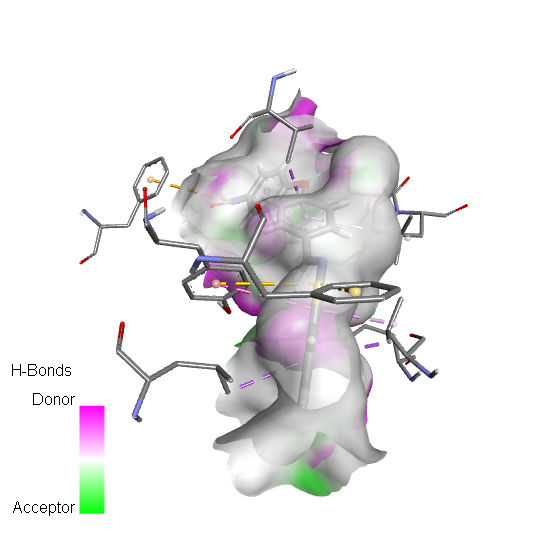  **G-9** | 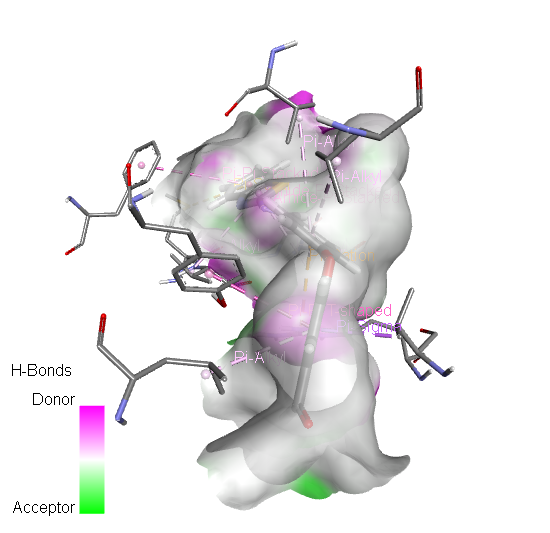  **G-10** |
| 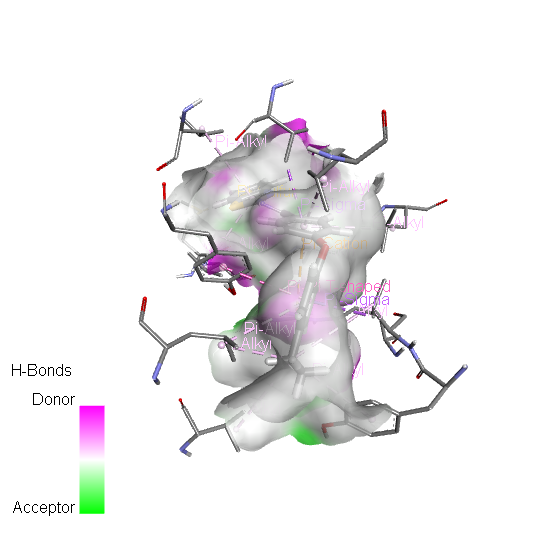  **G-11** | 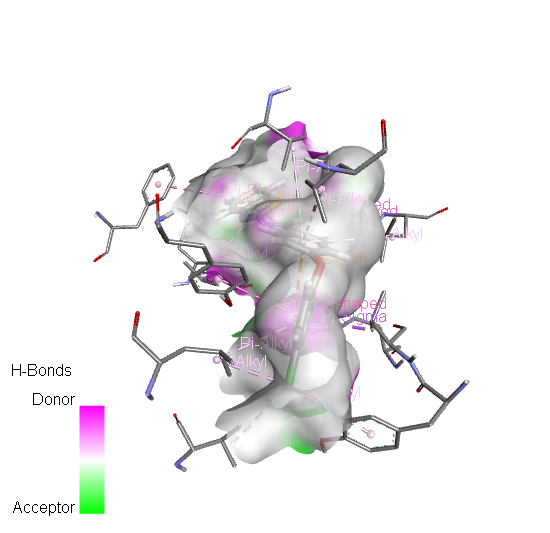  **G-12** |
| 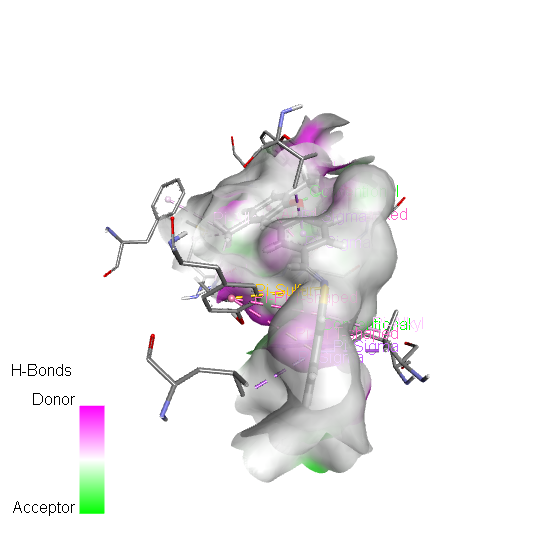  **G-13** |  |

**Figure 5.** The hydrogen bond surfaces for molecule G-1, G-2, G-3, G-4, G-5, G-6, G-7, G-8, G-9, G-10, G-11, G-12 and G-13 with COX-2

| 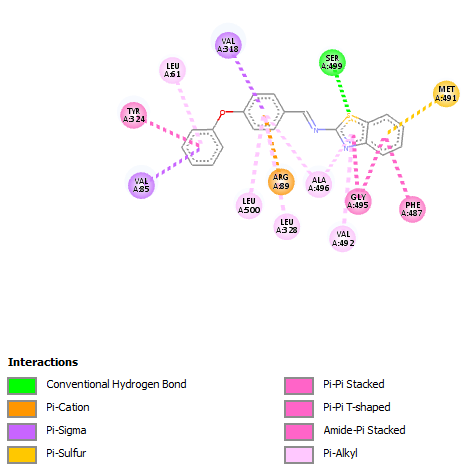  G-1 | 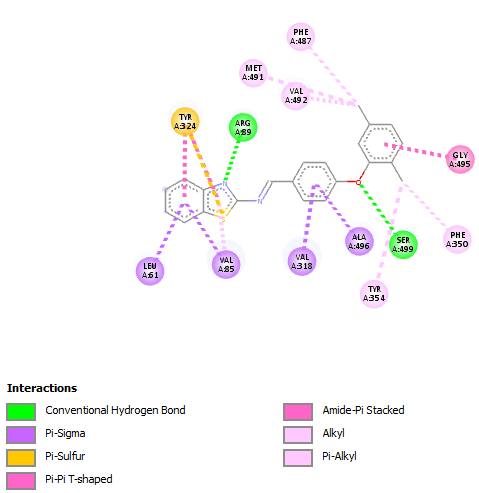  G-2 |
| --- | --- |
| 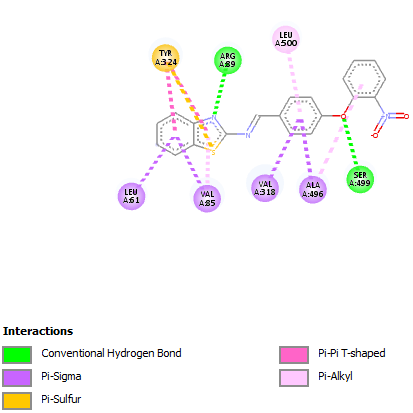  G-3 | 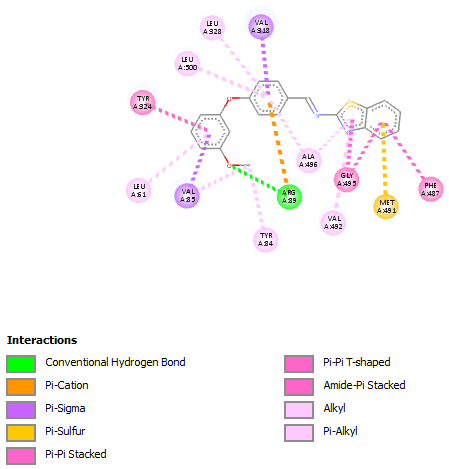  G-4 |
| 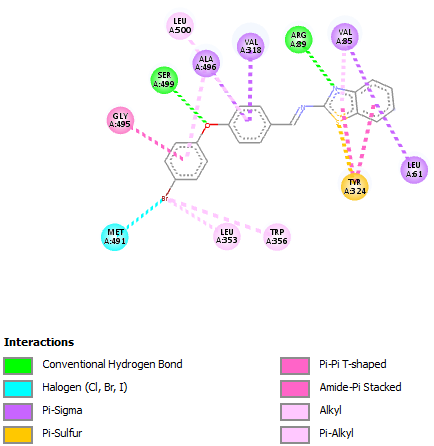  G-5 | 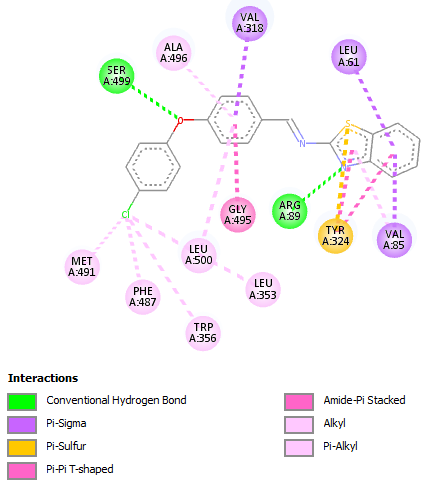  G-6 |
| 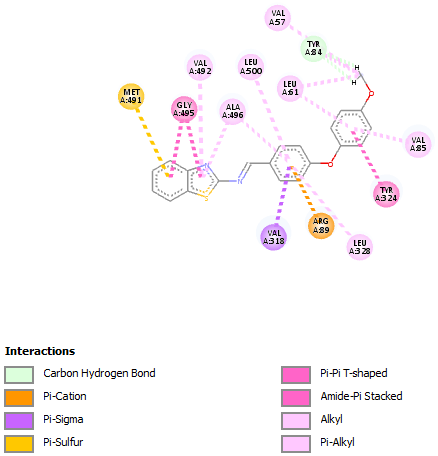  G-7 | 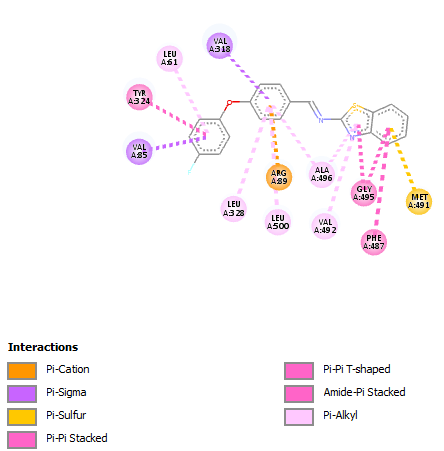  G-8 |
| 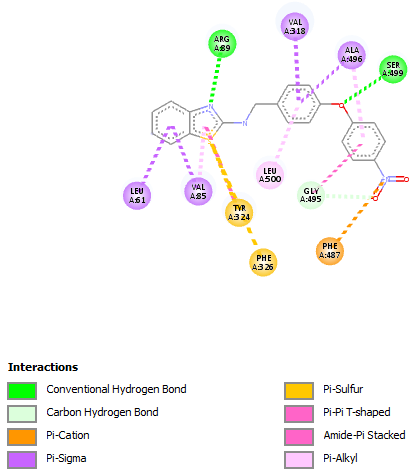  G-9 | 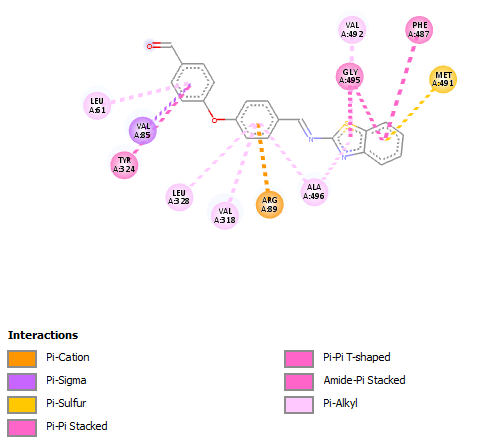  G-10 |
| 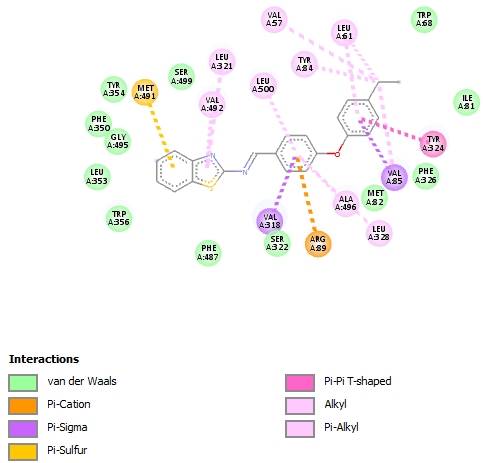  G-11 | 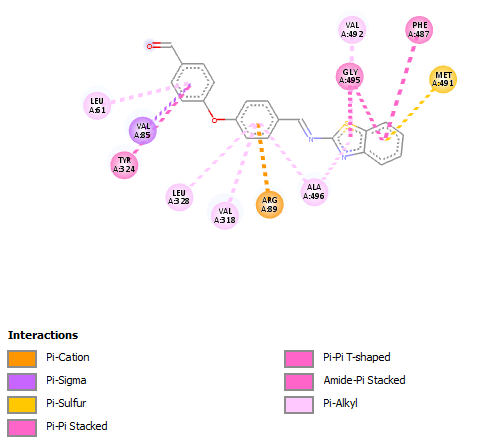  G-12 |
| 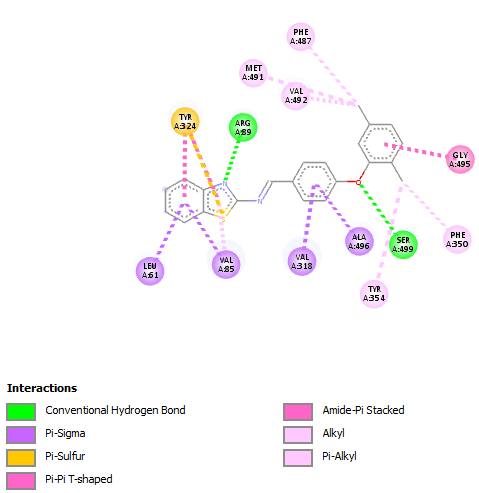  G-13 | 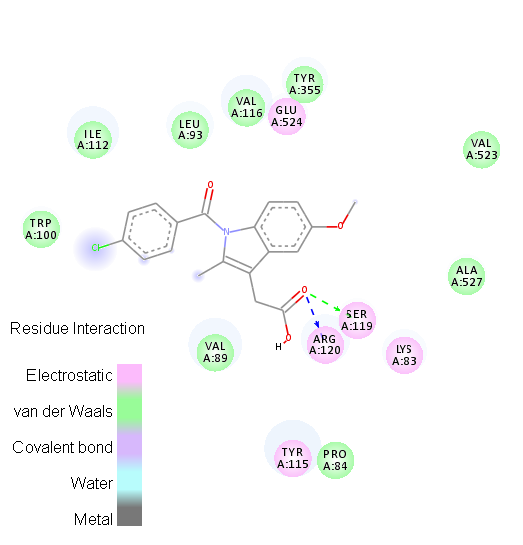  Indomethacin |

**Figure 6.** COX-2 complex with G-1, G-2, G-3, G-4, G-5, G-6, G-7, G-8, G-9, G-10, G-11, G-12, G-13 and Indomethacin.

| 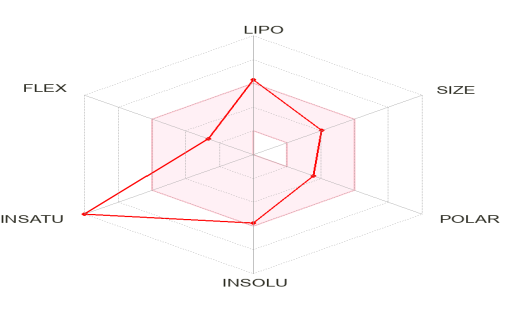  G-1 | 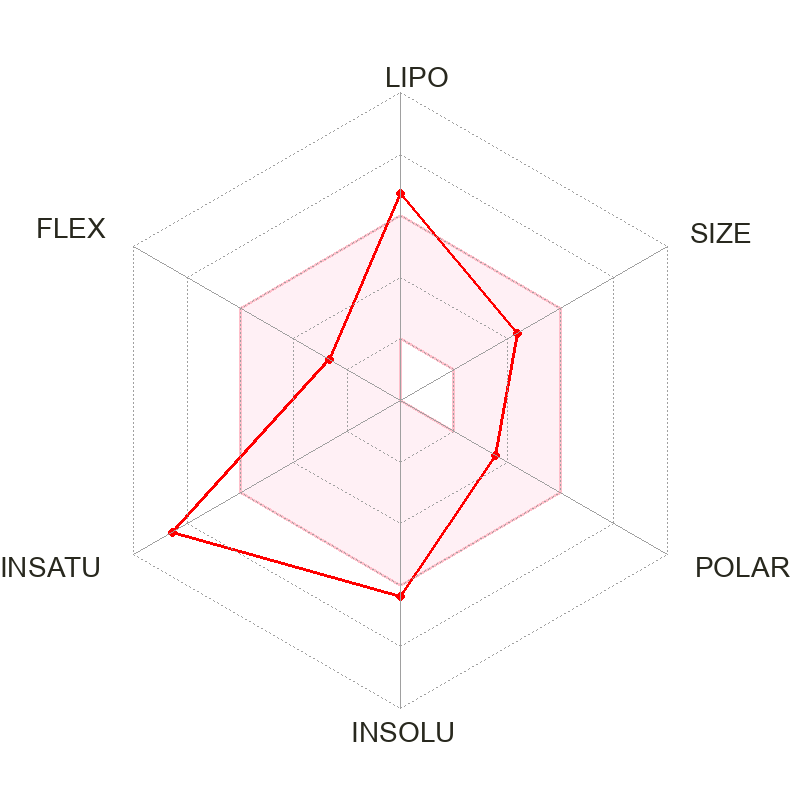  G-2 |
| --- | --- |
| 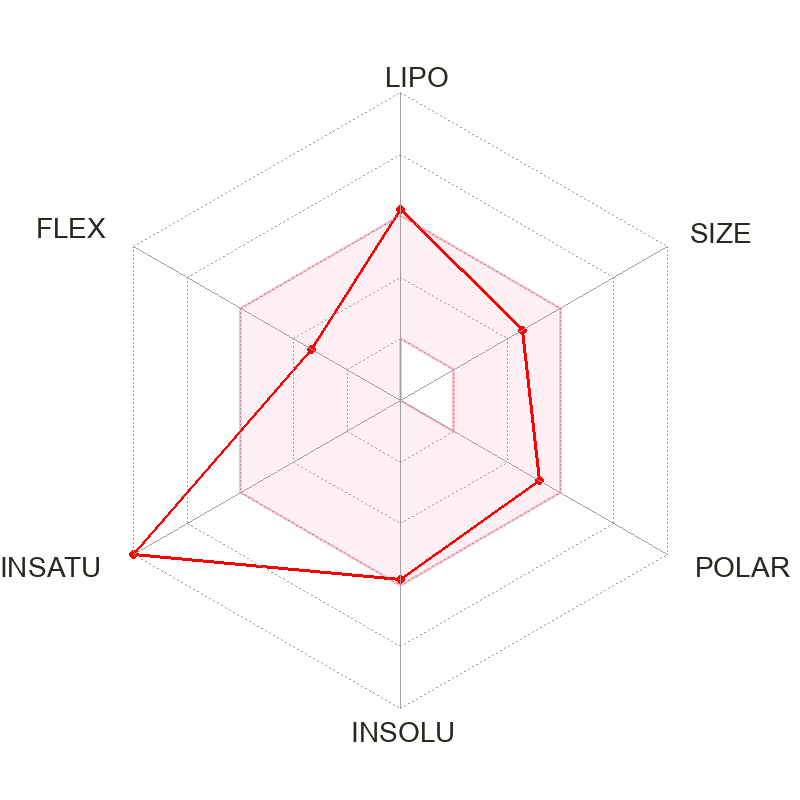  G-3 | 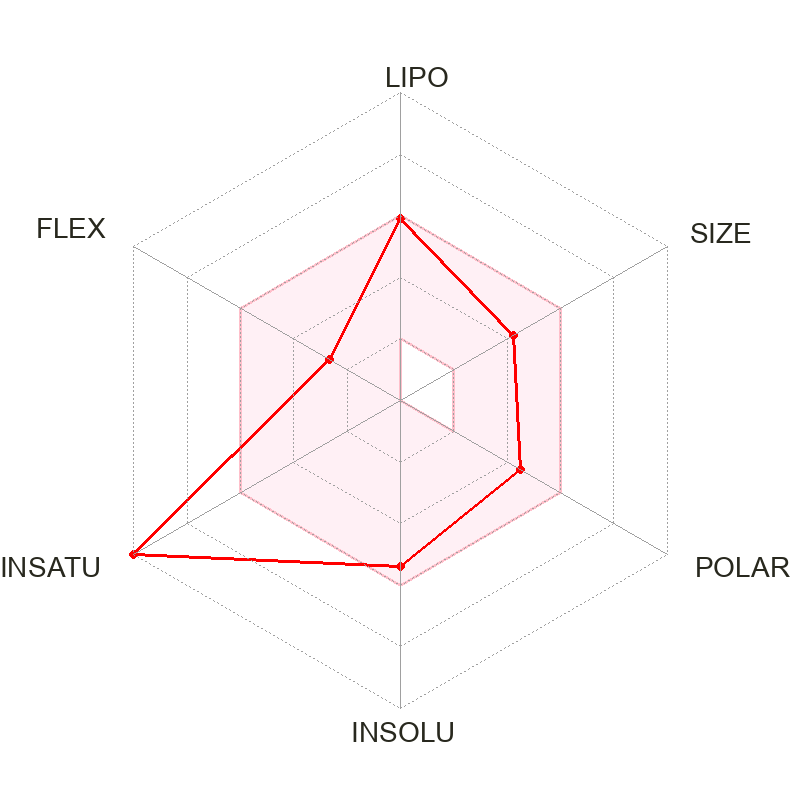  G-4 |
| 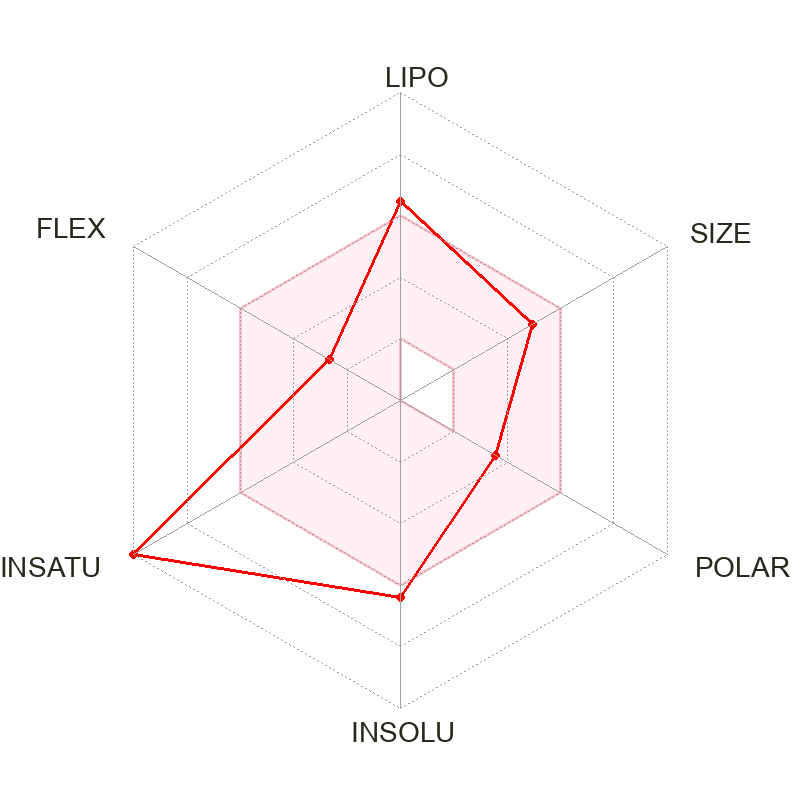  G-5 | 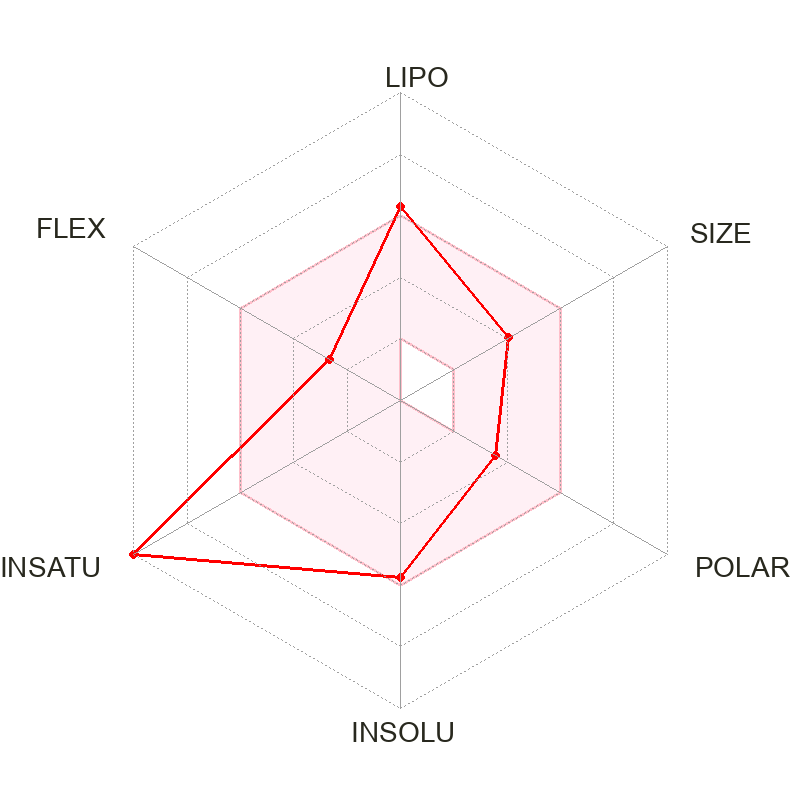  G-6 |
| 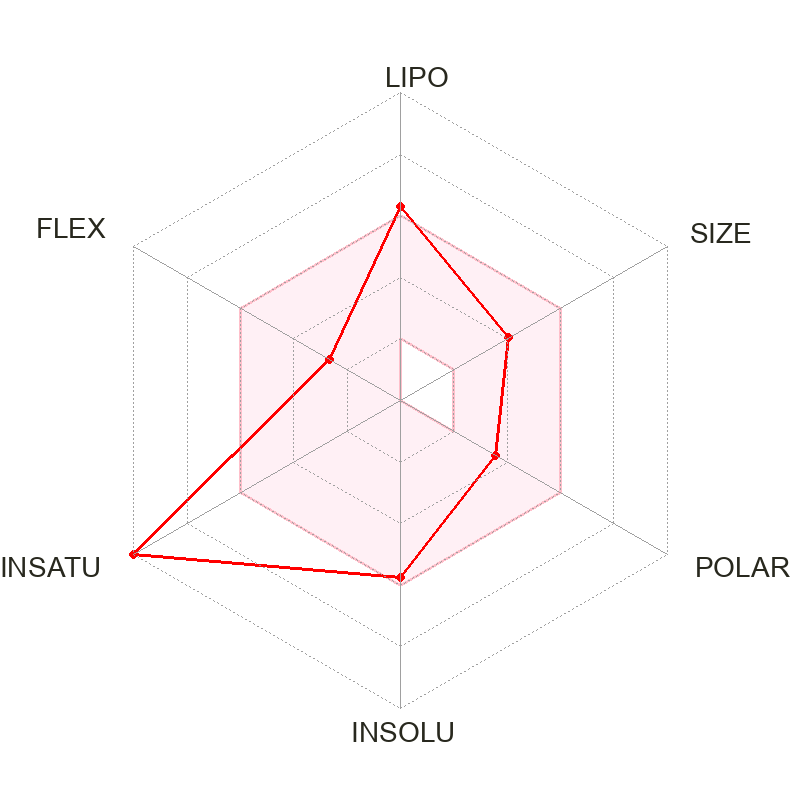  G-7 | 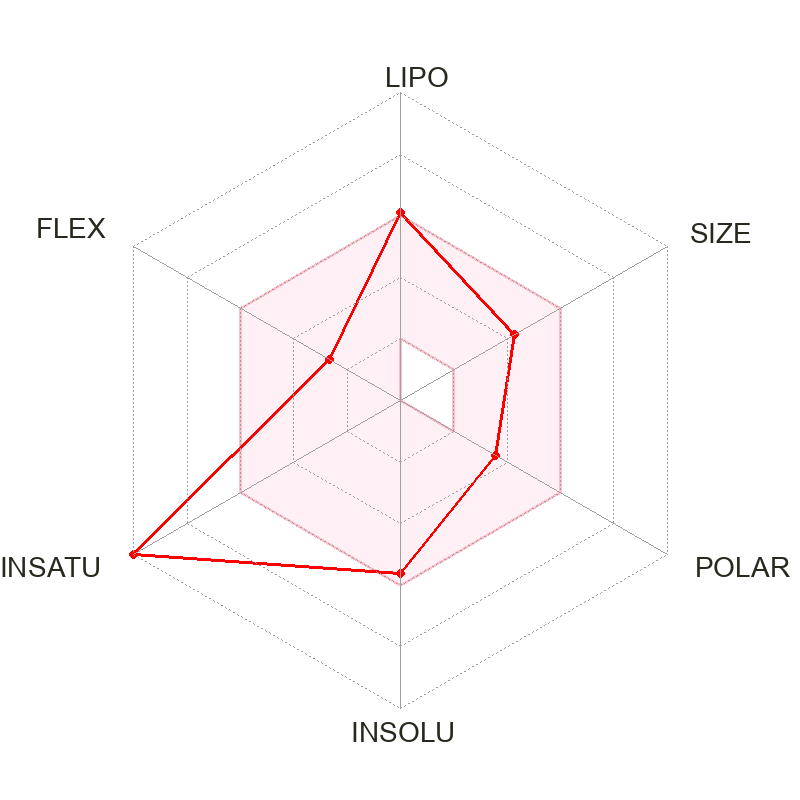  G-8 |
| 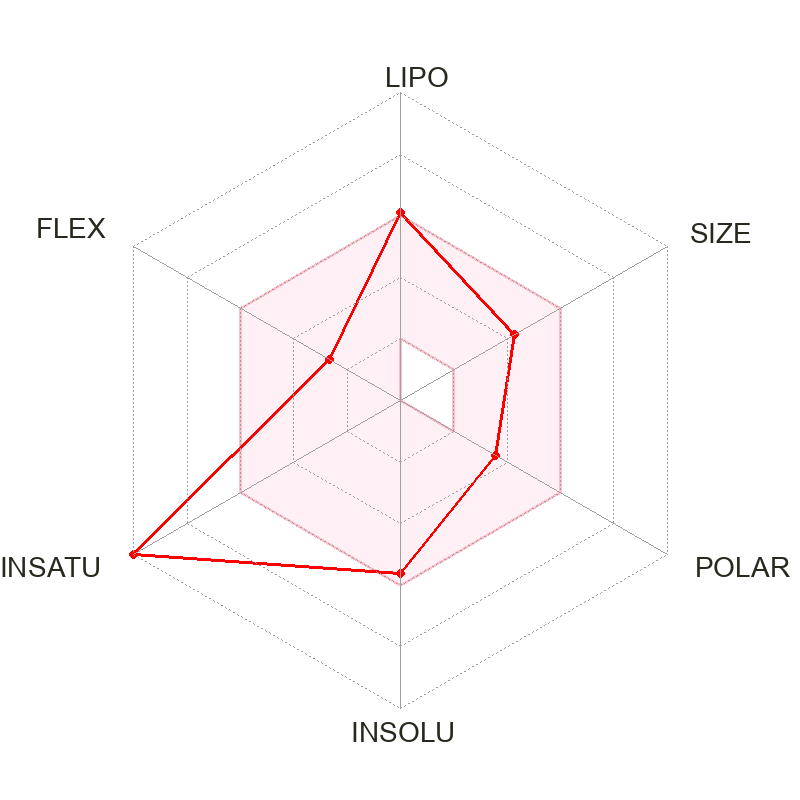  G-9 | 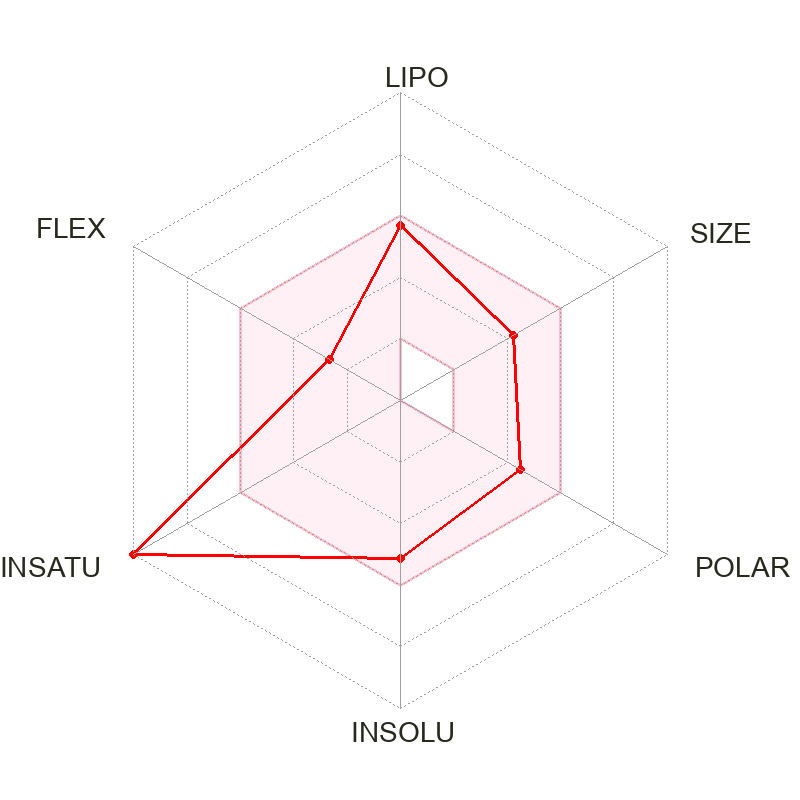  G-10 |
| 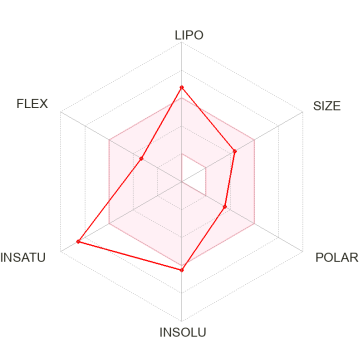  G-11 | 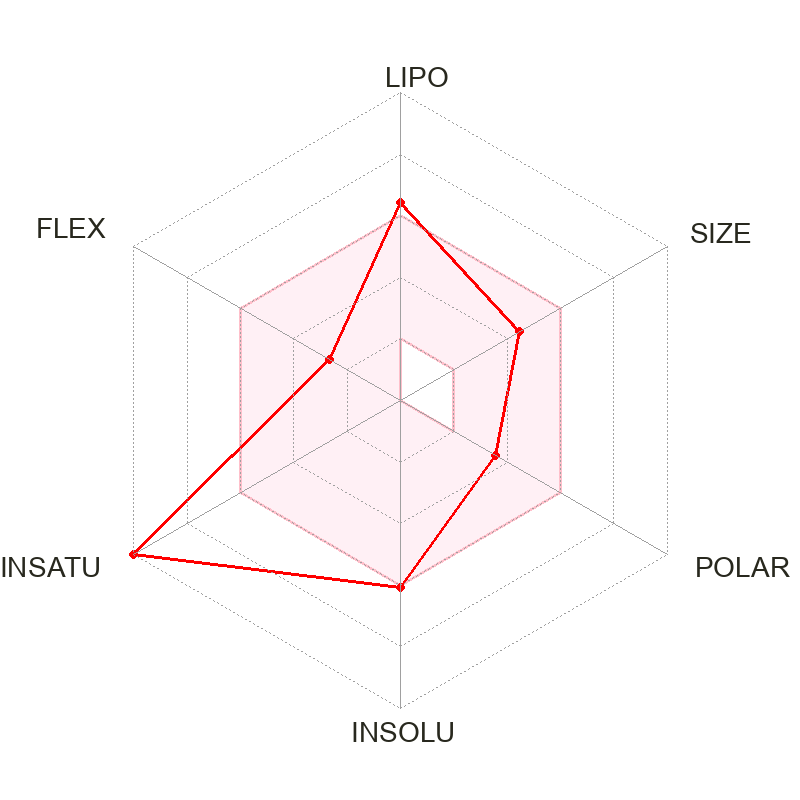  G-12 |
| 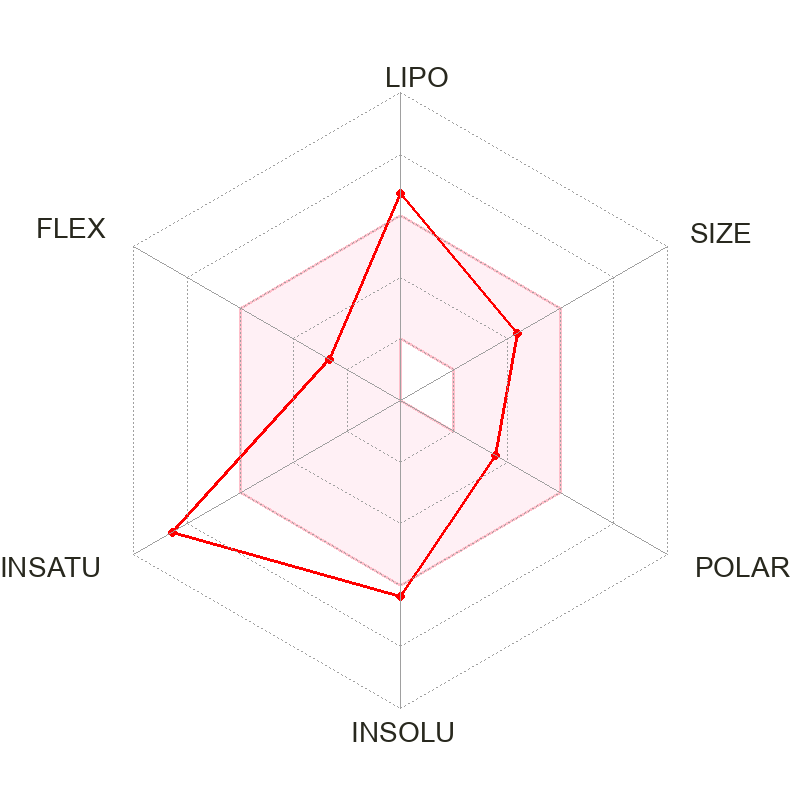  G-13 |  |

**Figure 7.** Bioavailability radar graph of benzo(d)thiazol-2-amine derivatives G-1-G-13 (pink area reflects the allowed values of drug likeness properties of the molecule).
